# Supplementary material for: MsNRAMP2 Enhances Tolerance to Iron Excess Stress in Nicotiana tabacum and MsMYB Binds to Its Promoter
Source: MDPI journal article supplement (doi:10.3390/ijms241411278), 2023-07-10
Supplement: s1 [file s1]

|           |                                                                                  |     |
|-----------|----------------------------------------------------------------------------------|-----|
| MsNRAMP2  | MSGFSEEDNSKEEVREEDGNRLLEVDEGEGLSTSEEAAMESEKIVVDFEFG..TVDDSTWPFPSWKLMFTGEG        | 78  |
| MtNRAMP2  | MSGFSEEDNSKEEVREEDGNRLLEVVEGE..SSSEEAAMESEKIVVDFEFG..TVDDSTWPFPSWKLMFTGEG        | 76  |
| AtNRAMP2  | .....ENIVVENLPEEDRLPPPPPSCLPSTISEEAAPETNEKILLVDFEFPDDPTTGDPFPPFSWKLMFTGEG        | 75  |
| Consensus | e ke ee se eaa e eki vdfe t ppsfw klw ftgpg                                      |     |
| MsNRAMP2  | FLMSIAFLDPGNLEGDLQAGAIAGYSLIWLWMWATL MGLLICSL SARVGVATGRHLAELCRDEYFWARYVLWMAELAL | 158 |
| MtNRAMP2  | FLMSIAFLDPGNLEGDLQAGAIAGYSLIWLWMWATL MGLLICSL SARVGVATGRHLAELCRDEYFWARYVLWMAELAL | 156 |
| AtNRAMP2  | FLMSIAFLDPGNLEGDLQAGAIAGYSLIWLWMWATL MGLLICSL SARVGVATGRHLAELCRDEYFWARYVLWMAELAL | 155 |
| Consensus | flmsiafldpgnlegdlqagaiagysllwllmwat mgllicl sarvgvatgrhlaelc eyp waryvlw maelal  |     |
| MsNRAMP2  | IGADIQEVIGSAIAIQILSRGLPLWAGVITASDCFLFLFLENYGVKLEAF FAVLIATMLSFAMWFGDACPSGKEIV    | 238 |
| MtNRAMP2  | IGADIQEVIGSAIAIQILSRGLPLWAGVITASDCFLFLFLENYGVKLEAF FAVLIATMLSFAMWFGDACPSGKEIV    | 236 |
| AtNRAMP2  | IGADIQEVIGSAIAIQILSRGLPLWAGVITASDCFLFLFLENYGVKLEAF FAVLIATMLSFAMWFGDACPSGKEIV    | 235 |
| Consensus | igadiqevigsaiaiqilsrg lplwagv itasdcf flflenygvrklea favliatm lsfamwfg dacpsgkel |     |
| MsNRAMP2  | GFILPFRSSKTHQAVGVVGCVMFHNVLHSAIVQSRKIDENKRRVQEALNYYIESVALSVTFMINLFVTTVFAK        | 318 |
| MtNRAMP2  | GFILPFRSSKTHQAVGVVGCVMFHNVLHSAIVQSRKIDENKRRVQEALNYYIESVALSVTFMINLFVTTVFAK        | 316 |
| AtNRAMP2  | GFILPFRSSKTHQAVGVVGCVMFHNVLHSAIVQSRKIDENKRRVQEALNYYIESVALSVTFMINLFVTTVFAK        | 315 |
| Consensus | gil pr sskti qavgvvgcvimphnvlhsalvqsrkidp k rvqealnyy ies val fminlfvttvfak      |     |
| MsNRAMP2  | GFYGTICANSIGLVNAGCYLDERGGGLPILYINGIGLLAAGQSSTITGTYAGQFIMGGFLNRLKKNRAITRSCAI      | 398 |
| MtNRAMP2  | GFYGTICANSIGLVNAGCYLDERGGGLPILYINGIGLLAAGQSSTITGTYAGQFIMGGFLNRLKKNRAITRSCAI      | 396 |
| AtNRAMP2  | GFYGTICANSIGLVNAGCYLDERGGGLPILYINGIGLLAAGQSSTITGTYAGQFIMGGFLNRLKKNRAITRSCAI      | 395 |
| Consensus | gfygt an iglvnagqyl ek gggl pilyingigllaagqsstittgtyagqfimggflnrlkkn ra itrscai  |     |
| MsNRAMP2  | VPTIIVAIVNRSASLDVLNWLNVLQSQIPFALLPLTLVSKERIMGSFKGFLERVAWTVAALIIINGYLLVDF         | 478 |
| MtNRAMP2  | VPTIIVAIVNRSASLDVLNWLNVLQSQIPFALLPLTLVSKERIMGSFKGFLERVAWTVAALIIINGYLLVDF         | 476 |
| AtNRAMP2  | VPTIIVAIVNRSASLDVLNWLNVLQSQIPFALLPLTLVSKERIMGSFKGFLERVAWTVAALIIINGYLLVDF         | 475 |
| Consensus | vpt i vaiv n seasldvlnewlnvlqs qipfal plltivske img fk gp l r awtvaal ingyll df  |     |
| MsNRAMP2  | FLSEVNSVLFQVACSTVYIAFIVYLISSGALPSALVDR...LPKGFCSSE                               | 529 |
| MtNRAMP2  | FLSEVNSVLFQVACSTVYIAFIVYLISSGALPSALVDR...LPKGFCSSE                               | 527 |
| AtNRAMP2  | FLSEVNSVLFQVACSTVYIAFIVYLISSGALPSALVDR...LPKGFCSSE                               | 529 |
| Consensus | f sev lfg c t yiafivylis s ps lpk s                                              |     |

**Figure S1.** *MsNRAMP2* , *MtNRAMP2*(XM\_013606289.3) and *AtNRAMP2*(NM\_103618.3) amino acid sequence alignment.

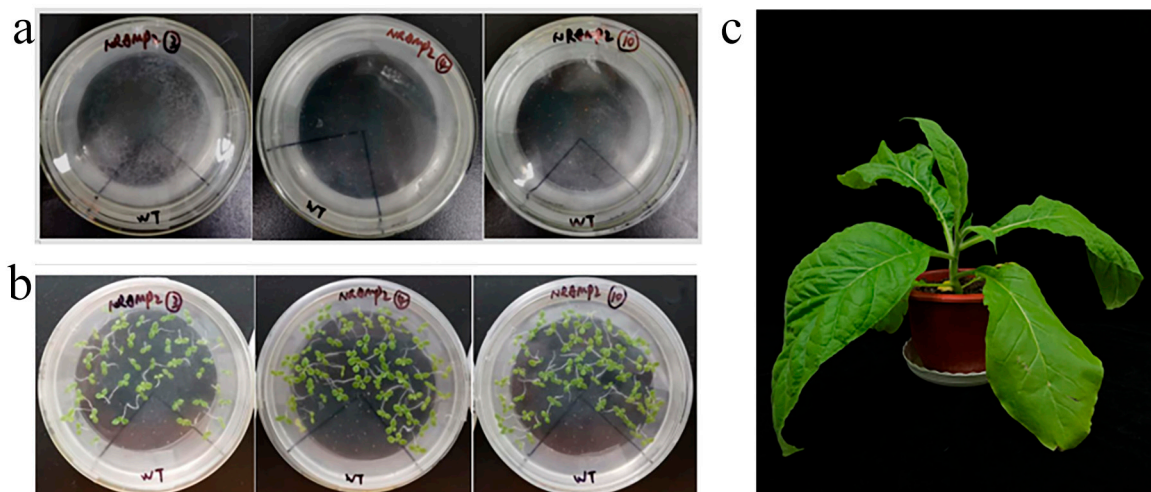

**Figure S2.** *MsNRAMP2* transgenic tobacco: (a) Germination of *MsNRAMP2* overexpression transgenic tobacco; (b) Screening and culture of *MsNRAMP2* transgenic tobacco; (c) *MsNRAMP2* transgenic tobacco positive plant.

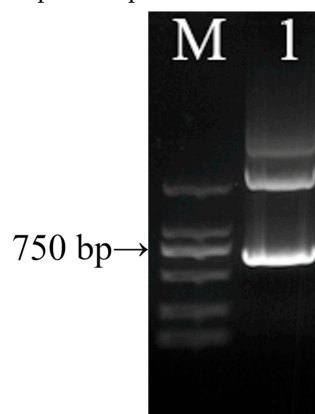

**Figure S3.** PCR amplification of *MsMYB* CDS fragment: M: DL2000 Marker; 1: *MsMYB* fragment.
